# Supplementary figures and images for: Topological line defects in hexagonal SiC monolayer
Source: Royal Society of Chemistry journal article supplement (doi:10.1039/d3cp04267g), 2023-01-01

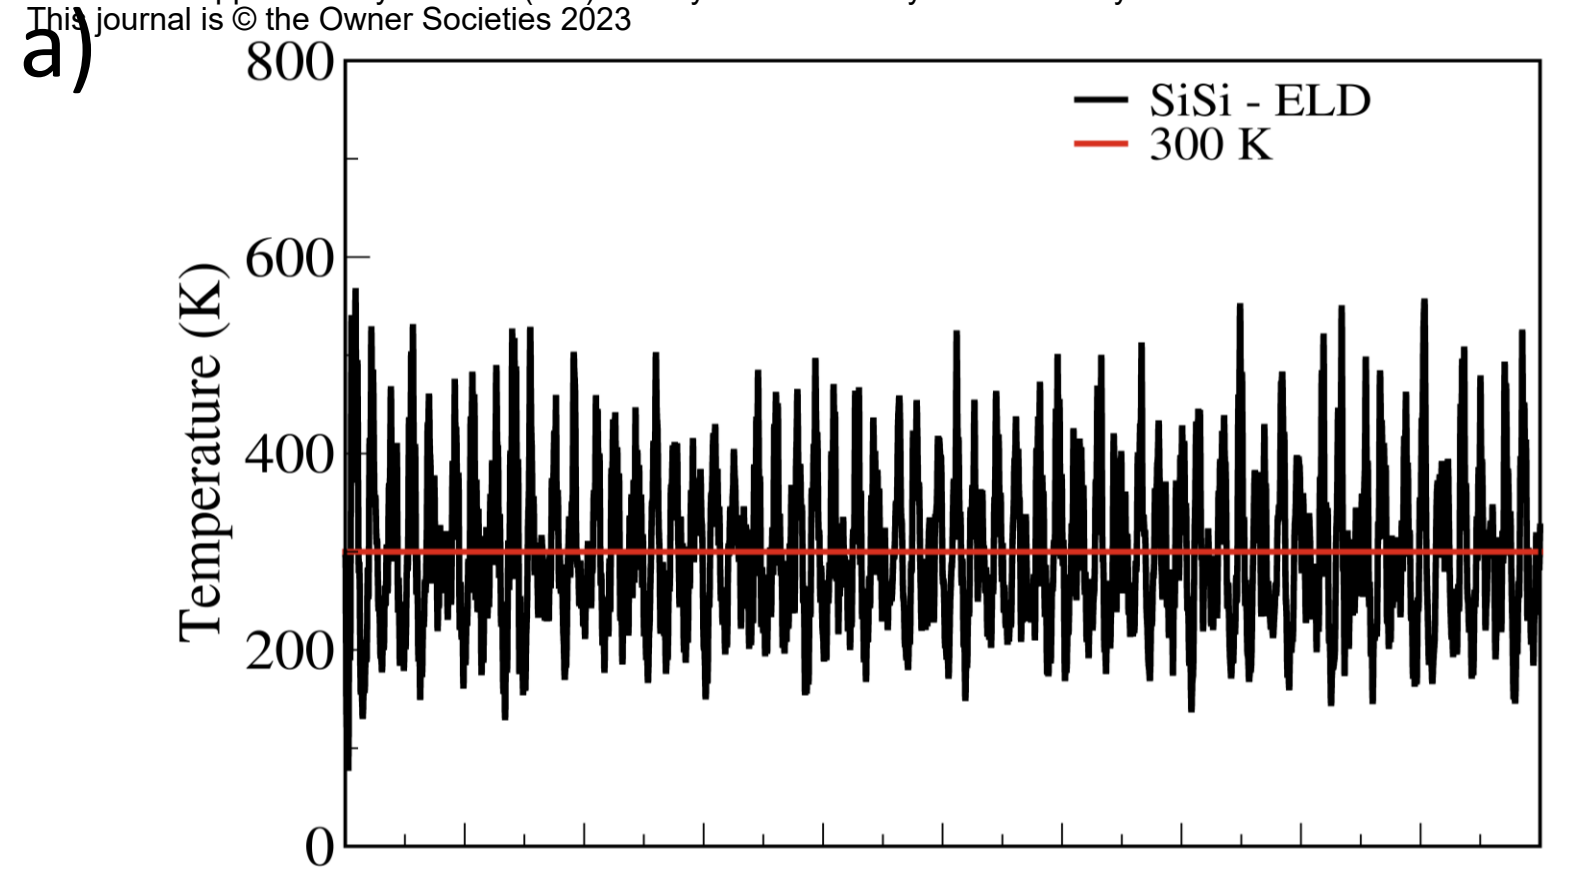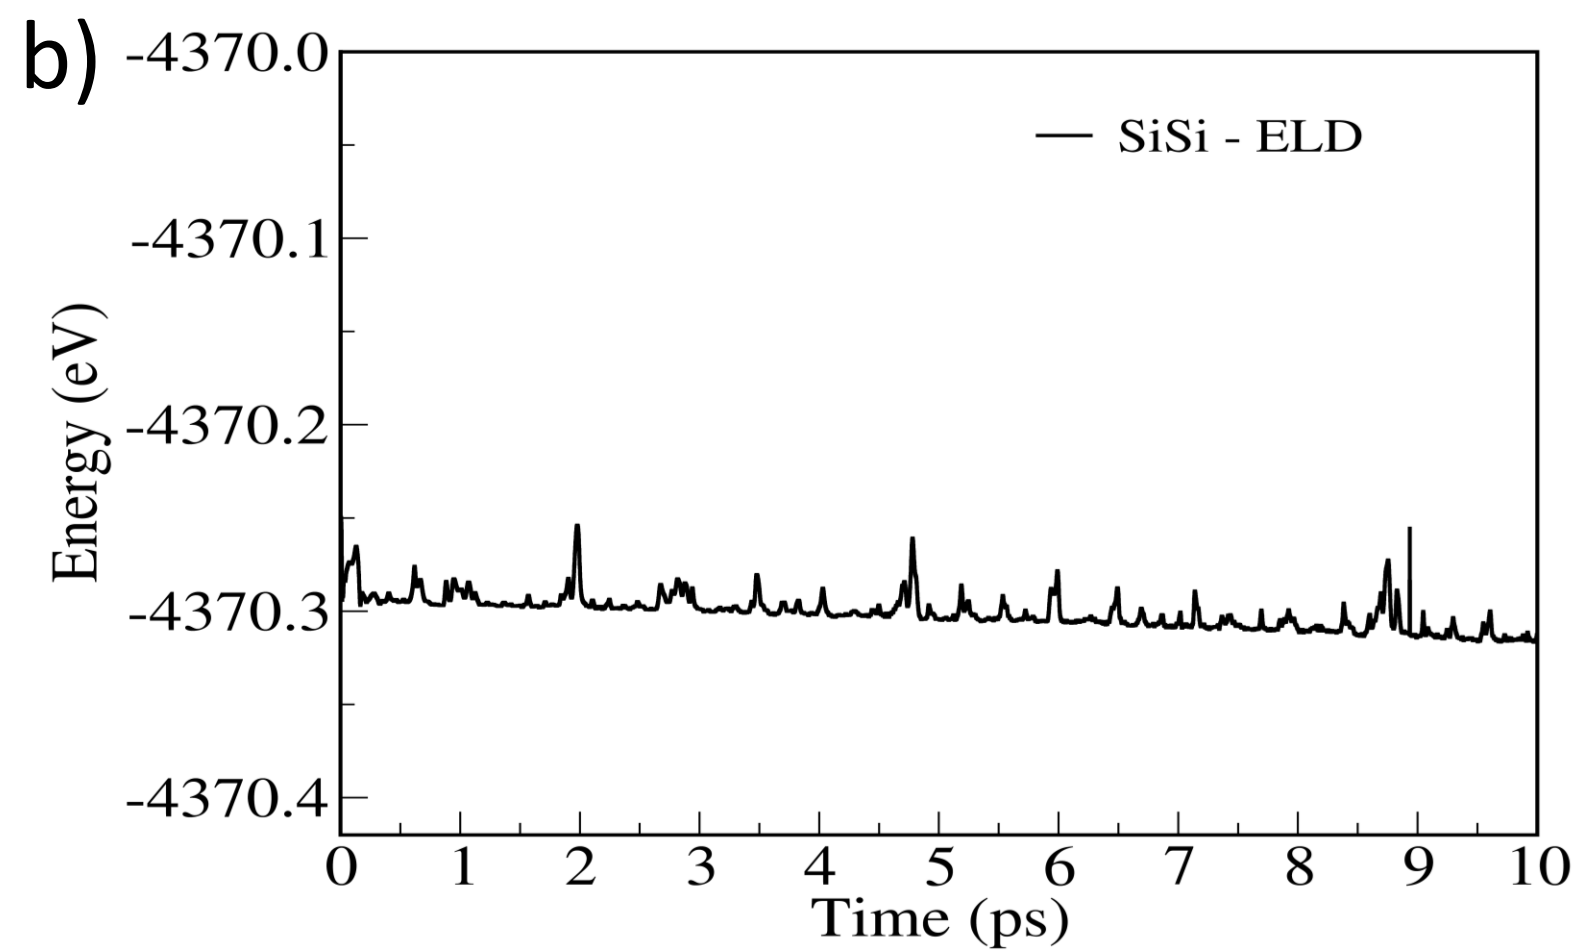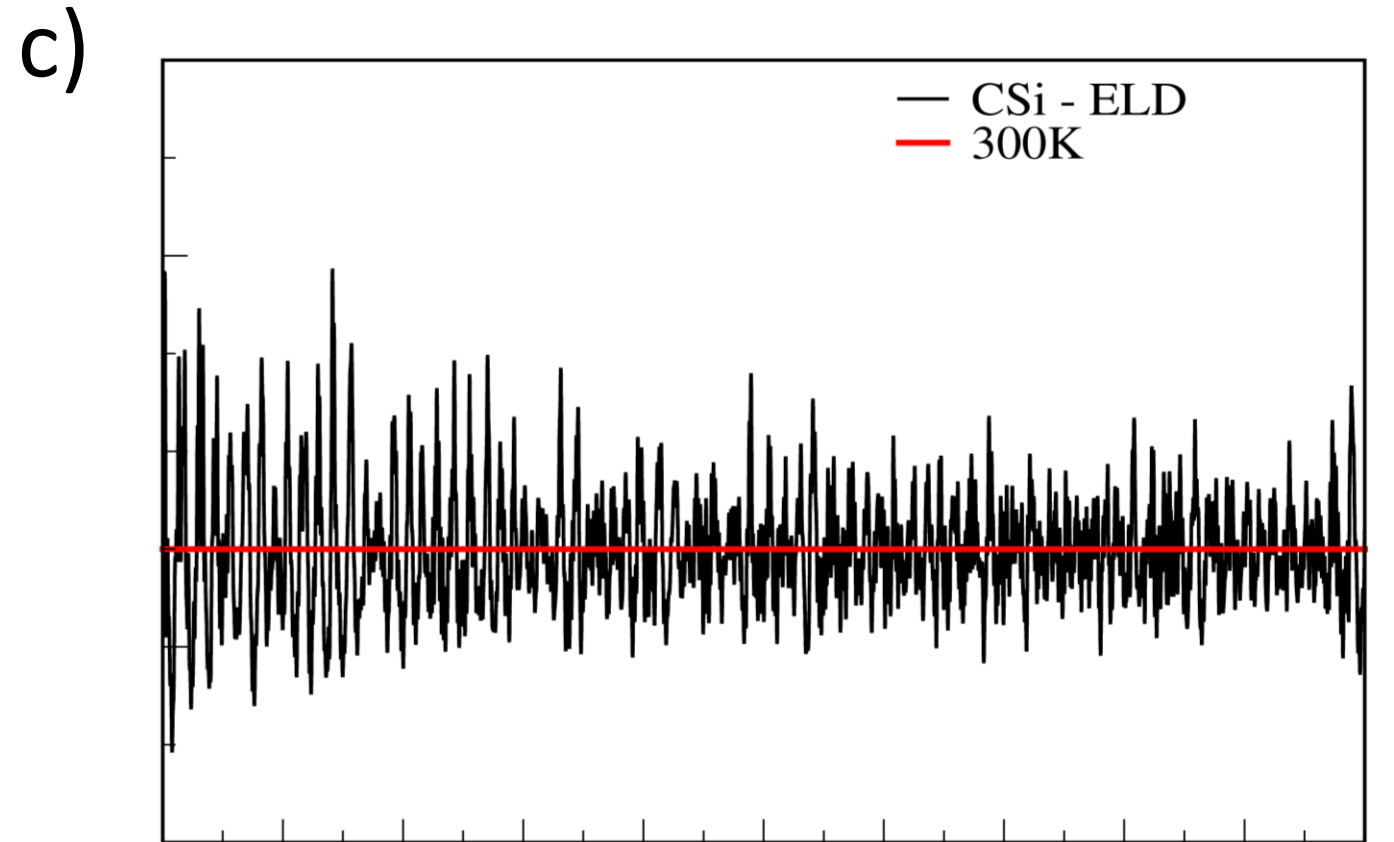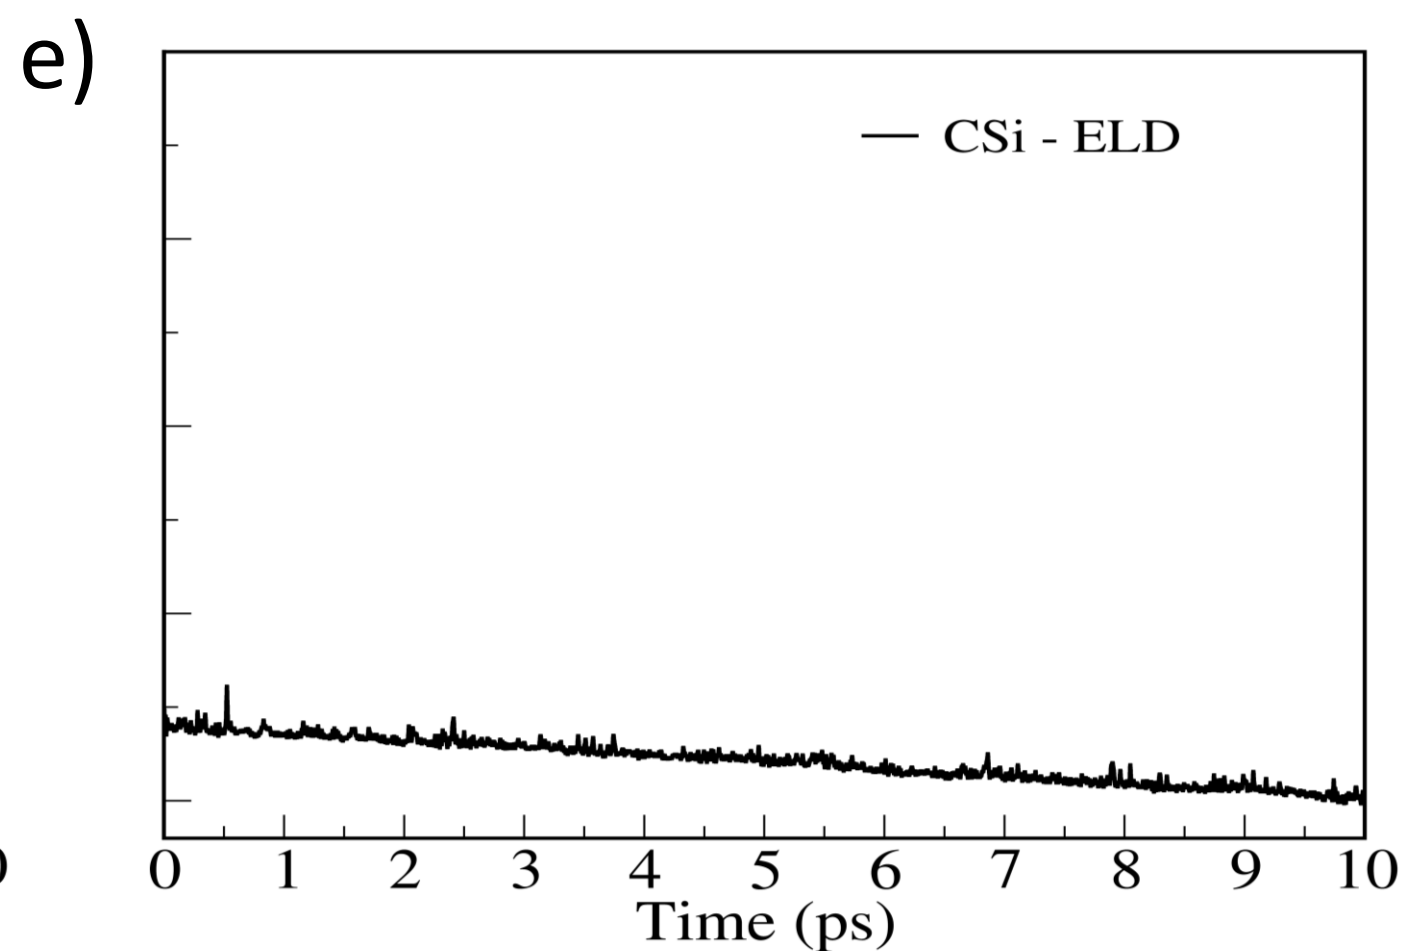

Supplement: d3cp04267g1.pdf [file d3cp04267g1.pdf]
